# Supplementary material for: Effect of antidepressants on functioning and quality of life outcomes in children and adolescents with major depressive disorder: a systematic review and meta-analysis
Source: PubMed Central journal article supplement (PMC9068747; doi:10.1038/s41398-022-01951-9), 2022-05-04

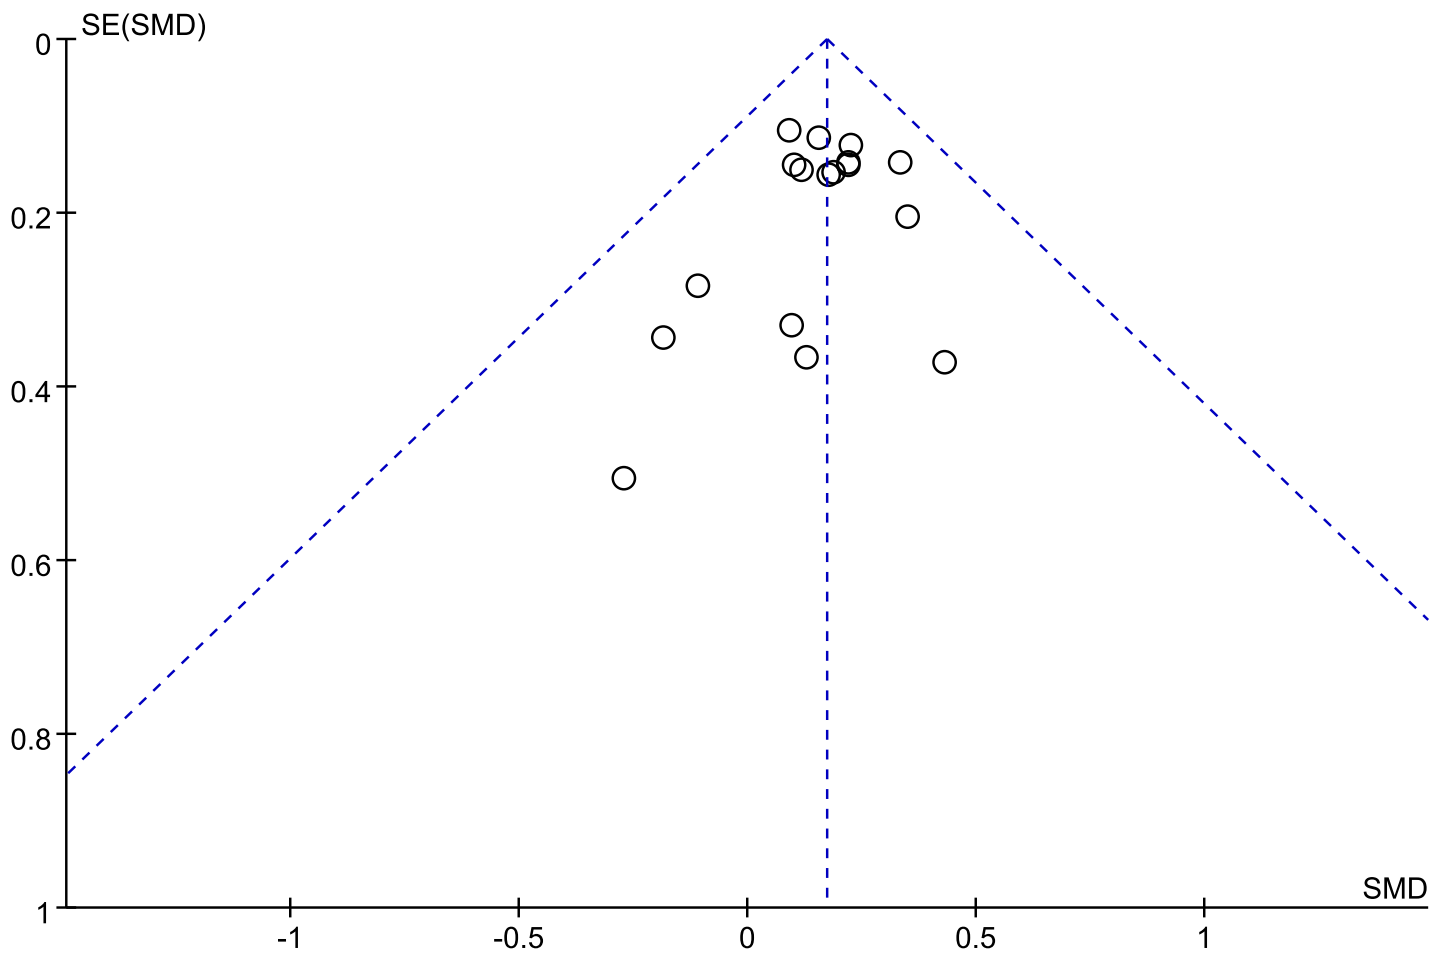

Supplement: 41398_2022_1951_MOESM5_ESM.pdf [file 41398_2022_1951_MOESM5_ESM.pdf]
