# Supplementary material for: Effect of antidepressants on functioning and quality of life outcomes in children and adolescents with major depressive disorder: a systematic review and meta-analysis
Source: Transl Psychiatry. 2022 May 4;12:183. doi: 10.1038/s41398-022-01951-9 (PMC9068747; doi:10.1038/s41398-022-01951-9)
Supplement: Supplementary file 4 — Supplemental Figure S1 [file 41398_2022_1951_MOESM4_ESM.pdf]

|                     | Random sequence generation (selection bias) | Allocation concealment (selection bias) | Blinding of participants and personnel (performance bias) | Blinding of outcome assessment (detection bias) | Incomplete outcome data (attrition bias) | Selective reporting (reporting bias) | Other bias | Total bias |
|---------------------|---------------------------------------------|-----------------------------------------|-----------------------------------------------------------|-------------------------------------------------|------------------------------------------|--------------------------------------|------------|------------|
| Almeida-Montes 2005 | +                                           | +                                       | ?                                                         | +                                               | -                                        | ?                                    | ?          | ?          |
| Berard 2006         | +                                           | +                                       | +                                                         | ?                                               | ?                                        | +                                    | ?          | ?          |
| Emslie 1997         | +                                           | ?                                       | +                                                         | +                                               | +                                        | -                                    | ?          | ?          |
| Emslie 2002a        | +                                           | ?                                       | +                                                         | ?                                               | ?                                        | -                                    | -          | -          |
| Emslie 2002b        | ?                                           | ?                                       | ?                                                         | ?                                               | ?                                        | ?                                    | ?          | ?          |
| Emslie 2006         | +                                           | ?                                       | ?                                                         | ?                                               | +                                        | +                                    | ?          | ?          |
| Emslie 2009         | ?                                           | ?                                       | ?                                                         | ?                                               | +                                        | -                                    | +          | ?          |
| Findling 2009       | +                                           | +                                       | ?                                                         | +                                               | +                                        | ?                                    | ?          | ?          |
| Geller 1990         | ?                                           | ?                                       | +                                                         | -                                               | ?                                        | ?                                    | ?          | ?          |
| Geller 1992         | ?                                           | ?                                       | +                                                         | +                                               | +                                        | ?                                    | ?          | ?          |
| Klein 1998          | ?                                           | ?                                       | ?                                                         | ?                                               | ?                                        | ?                                    | ?          | ?          |
| March 2004          | +                                           | +                                       | +                                                         | +                                               | +                                        | -                                    | ?          | +          |
| Noury 2015          | +                                           | +                                       | +                                                         | +                                               | +                                        | +                                    | +          | +          |
| Puig-Antich 1987    | +                                           | ?                                       | +                                                         | +                                               | ?                                        | ?                                    | ?          | ?          |
| Wagner 2003         | +                                           | ?                                       | +                                                         | ?                                               | +                                        | -                                    | -          | -          |
| Wagner 2004         | ?                                           | ?                                       | ?                                                         | ?                                               | -                                        | -                                    | ?          | -          |
| Wagner 2006         | ?                                           | ?                                       | ?                                                         | ?                                               | ?                                        | ?                                    | +          | ?          |
